# Supplementary material for: Fake news detection: a survey of evaluation datasets
Source: PeerJ Comput Sci. 2021 Jun 18;7:e518. doi: 10.7717/peerj-cs.518 (PMC8237334; doi:10.7717/peerj-cs.518)
Supplement: Supplemental Information 2 — All identified articles and the elaboration of data. [file peerj-cs-07-518-s002.xlsx]

## Sheet: Lists of articles
	Articles after duplicates removed (n = 164)
	1. A framework for fake review detection in online consumer electronics retailers
	2. A hybrid approach to fake news detection on social media
	3. A semi-supervised approach to message stance classification
	4. A Survey on Detection of Fake News in Social Media
	5. A survey on fake news and rumour detection techniques
	6. An Information Nutritional Label for Online Documents
	7. An overview of online fake news Characterization, detection, and discussion
	8. Analysis Of Classifiers For Fake Review Detection
	9. Analysing how people orient to and spread rumours in social media by looking at conversational threads
	10. Arabic News Credibility On Twitter An Enhanced Model Using Hybrid Features
	11. Attention to news and its dissemination on Twitter A survey
	12. Behind the cues A benchmarking study for fake news detection
	13. Big Data and quality data for fake news and misinformation detection
	14. Biomedical Engineering Research in the Social Network Analysis Era: Stance Classification for Analysis of Hoax Medical News in Social Media
	15. Combating fake news: A survey on identification and mitigation techniques.
	16. Cooperative trust relaying and privacy preservation via edge-crowdsourcing in social Internet of Things
	17. Credibility in social media: opinions, news, and health information—a survey
	18. Data Provenance What next
	19. Deep learning for affective computing Text-based emotion recognition
	20. Detecting breaking news rumors of emerging topics in social media
	21. Detecting Fake News in Social Media Networks
	22. Detecting opinion spams and fake news using text classification
	23. Detection of fake news in a new corpus for the Spanish language
	24. Effects of human and human-machine fake news detection approaches on user detection performance
	25. Estimating deception in consumer reviews based on extreme terms
	26. Fake News and its Credibility Evaluation by Dynamic Relational Networks A Bottom up Approach
	27. Fake news detection in social media
	28. Fake News Detection on Social Media: A Data Mining Perspective
	29. Fake News Detection_ A Deep Learning Approach
	30. Fake News Early Detection: A Theory-driven Model
	31. Fake news portrayals of stem cells and stem cell research
	32. Fake News Prediction A Survey
	33. Fake News: A Survey of Research, Detection Methods, and Opportunities
	34. Fake news’ meets tourism a proposed research agenda
	35. FakeNewsTracker: a tool for fake news collection, detection, and visualization
	36. Finding Truth in Fake News_ Reverse Plagiarism and other Models
	37. Implicit dimension identification in user-generated text with LSTM networks
	38. Info-Trust A Multi-Criteria and Adaptive
	39. Introduction to the Special Issue on Combating Digital Misinformation and Disinformation
	40. Polarization and Fake News: Early Warning of Potential Misinformation Targets
	41. News reliability evaluation using Latent Semantic Analysis
	42. Novel Visual and Statistical Image Features for Microblogs News Verification
	43. Online fake news detection algorithm
	44. Opinion fraud detection via neural autoencoder decision forest
	45. Polarization and Fake News: EarlyWarning of Potential
	46. Proppy Organizing the news based on their propagandistic content
	47. Review Study of Hoax Email Characteristic
	48. Stance-In-DepthDeep Neural Approach to Stance Classification
	49. Supervised Learning for Fake News Detection
	50. Towards Automatic Fake News Classification
	51. The Web of False Information Rumors, Fake News, Hoaxes, Clickbait, and Various Other Shenanigans
	52. Truth and deception at the retorical structure level
	53. Unsupervised Scalable Statistical Method for Identifying Influential Users in Online Social Networks
	54. Utilizing computational trust to identify rumor spreaders on Twitter
	55. Proof of credibility: A blockchain approach for detecting and blocking fake news in social networks
	56. Robust fake news detection over time and attack
	57. Detection and veracity analysis of fake news via scrapping and authenticating the web
	58. Understanding archetypes of fake news via fine-grained classification
	59. Fake news analysis modeling using quote retweet
	60. Rumor detection in Arabic tweets using semi-supervised and unsupervised expectation–maximization
	61. CED: credible early detection of social media rumors
	62. A Multi-Criteria Decision Making approach based on the Choquet integral for assessing the credibility of User-Generated Content
	63. Isolating rumors using sentiment analysis
	64. A multi-agent architecture for data analysis
	65. Discourse-aware rumour stance classification in social media using sequential classifiers
	66. Empirical study of shallow and deep learning models for sarcasm detection using context in benchmark datasets
	67. Sarcasm Detection for Workplace Stress Management
	68. Building a National Neighborhood Dataset From Geotagged Twitter Data for Indicators of Happiness, Diet, and Physical Activity
	69. Predicting the Veracity of Fake Information on Smart Media for Reducing Misinformation Diffusion
	70. A topic enhanced approach to detecting multiple standpoints in web texts
	71. Research Analysis in Automatic Fake News Detection
	72. Visual content-based web page categorization with deep transfer learning and metric learning
	73. Trsdl: Tag-aware recommender system based on deep learning–intelligent computing systems
	74. Twitter permeability to financial events: an experiment towards a model for sensing irregularities
	75. Rumors Detection on Twitter Using Machine Learning Techniques
	76. Paragraph-based representation of texts: A complex networks approach
	77. A nature-inspired approach based on Forest Fire model for modeling rumor propagation in social networks
	78. Sarcasm Detection Algorithms
	79. THE PROBLEM OF FAKE NEWS IN TIMES: DETECTION AND COUNTERMEASURES
	80. Mining social media for newsgathering: A review
	81. Large Scale Linguistic Processing of Tweets to Understand Social Interactions among Speakers of Less Resourced Languages: The Basque Case
	82. Source detection of rumor in social network–a review
	83. Spam Detection on Profile and Social Media Network using Principal Component Analysis (PCA) and K-means Clustering
	84. Fake news, rumor, information pollution in social media and web: A contemporary survey of state-of-the-arts, challenges and opportunities
	85. Overview of the special issue on trust and veracity of information in social media
	86. The web of false information: Rumors, fake news, hoaxes, clickbait, and various other shenanigans
	87. Understanding the user generated content and interactions on a Facebook brand page
	88. Signaling sarcasm: From hyperbole to hashtag
	89. “Fake News” Is Not Simply False Information: A Concept Explication and Taxonomy of Online Content
	90. A pattern-based approach for sarcasm detection on twitter
	91. Application of provenance in social computing: A case study
	92. Least cost influence maximization across multiple social networks
	93. Privacy landscape in online social networks
	94. A framework for event classification in tweets based on hybrid semantic enrichment
	95. Computational irony: A survey and new perspectives
	96. The evolution of argumentation mining: From models to social media and emerging tools
	97. Soukhria: Towards an irony detection system for arabic in social media
	98. A Comparison of Fake News Detecting and Fact-Checking AI Based Solutions
	99. A Survey of Phishing Email Filtering Techniques
	100. Wait Signals Predict Sarcasm in Online Debates
	101. Cyberbullying detection on social multimedia using soft computing techniques: a meta-analysis
	102. The locus of legitimate interpretation in Big Data sciences: Lessons for computational social science from-omic biology and high-energy physics
	103. How information around acute events comes into being on social media. A comparative analysis of interpretive communities on Weibo and Twitter
	104. How does information around acute events come into being on social media?
	105. Detection of sarcasm and nastiness: new resources for Spanish language
	106. Emotion, lies, and “bullshit” in journalistic discourse: The case of fake news
	107. Early prediction of the future popularity of uploaded videos
	108. Twitter rumour detection in the health domain
	109. Hybridizing metric learning and case-based reasoning for adaptable clickbait detection
	110. Clickbait detection using multiple categorisation techniques
	111. Rumour Detection from Social Media : A Review
	112. An Effective Approach for Clickbait Detection Based on Supervised Machine Learning Technique
	113. ENSEMBLE LEARNING APPROACH FOR CLICKBAIT DETECTION USING ARTICLE HEADLINE FEATURES
	114. Rumour Detection Models & Tools for Social Networking Sites
	115. Twitter’s Rumour Detection Using ID Based Clustering
	116. DETECTION OF CONTEXT-VARYING RUMORS ON TWITTER THROUGH DEEP LEARNING
	117. A corpus of debunked and verified user-generated videos
	118. Analysis and Detection of Health-Related Misinformation on Chinese Social Media
	119. Twitter’s Rumour Detection Using ID Based Clustering
	120. Rumors detection, verification and controlling mechanisms in online social networks: A survey
	121. False News On Social Media: A Data-Driven Survey
	122. A novel automatic satire and irony detection using ensembled feature selection and data mining
	123. Detecting misinformation in social networks using provenance data
	124. Detection and Resolution of Rumours in Social Media: A Survey
	125. Detecting Clickbait: Here's How to Do It
	126. Gaussian Processes for Rumour Stance Classification in Social Media
	127. Rumour verification through recurring information and an inner-attention mechanism
	128. Video Analysis with Image Recognition in TensorFlow
	129. Automatic detection of satire in Twitter: A psycholinguistic-based approach
	130. Towards reliable online clickbait video detection: A content-agnostic approach
	131. Official Statistics as Clickbait—The New Threat in the Post-truth Society?
	132. Hoax News Detection on Twitter using Term Frequency Inverse Document Frequency and Support Vector Machine Method
	133. Rumour veracity detection on twitter using particle swarm optimized shallow classifiers
	134. Misinformation in Online Social Networks: Detect Them All with a Limited Budget
	135. The rumour spectrum
	136. A Review Rumors Detection on Twitter Using Machine Learning Techniques"
	137. False information detection in online content and its role in decision making: a systematic literature review.
	138. Automatic Irony Detection using Feature Fusion and Ensemble Classifier
	139. Making objective decisions from subjective data: Detecting irony in customer reviews, Decision Support Systems"
	140. From humor recognition to irony detection: The figurative language of social media
	141. Sentiment Analysis on Twitter Based on Ensemble of Psychological and Linguistic Feature Sets
	142. Fake News Identification and Classification Using DSSM and Improved Recurrent Neural Network Classifier
	143. Recognition of Ironic Sentences in Twitter using Attention-Based LSTM
	144. Representing vaccine misinformation using ontologies.
	145. Detection and visualization of misleading content on Twitter
	146. exBAKE: Automatic Fake News Detection Model Based on Bidirectional Encoder Representations from Transformers (BERT)
	147. On the difficulty of automatically detecting irony: beyond a simple case of negation
	148. A Novel Approach for Detection of Fake News on Social Media Using Metaheuristic Optimization Algorithms
	149. A Multi-semantics Classification Method Based on Deep Learning for Incredible Messages on Social Media
	150. A parallel neural network approach for faster rumor identification in online social networks
	151. Deep recurrent neural network and data filtering for rumor detection on Sina Weibo
	152. Detecting rumors through modeling information propagation networks in a social media environment
	153. DiffRank: A novel algorithm for information diffusion detection in social networks
	154. Misinformation detection based on gatekeepers' behaviors in microblog
	155. QuickStop: A markov optimal stopping approach for quickest misinformation detection"
	156. Research on evaluation model of microblog information confidence based on bp neural network
	157. Research on online social network information diffusion detection node selection algorithm based on the random walk model
	158. Clickbait Convolutional Neural Network
	159. Email Hoax Detection System Using Levenshtein Distance Method
	160. From Anomaly Detection to Rumour Detection using Data Streams of Social Platforms
	161. How and Why Some Issues Spread Fast in Social Media
	162. Implementation of Emotional Features on Satire Detection
	163. Is This Tweet Satirical? A Computational Approach for Satire Detection in Spanish
	164. Predicting Future Rumours
	Full-text articles assessed for eligibility (n = 61)
	1. A framework for fake review detection in online consumer electronics retailers
	2. A semi-supervised approach to message stance classification
	3. A Survey on Detection of Fake News in Social Media
	4. A survey on fake news and rumour detection techniques
	5. An overview of online fake news Characterization, detection, and discussion
	6. ANALYSIS OF CLASSIFIERS FOR FAKE REVIEW DETECTION
	7. Analysing how people orient to and spread rumours in social media by looking at conversational threads
	8. ARABIC NEWS CREDIBILITY ON TWITTER AN ENHANCED MODEL USING HYBRID FEATURES
	9. Behind the cues A benchmarking study for fake news detection
	10. Big Data and quality data for fake news and misinformation detection
	11. Biomedical Engineering Research in the Social Network Analysis Era: Stance Classification for Analysis of Hoax Medical News in Social Media
	12. Combating fake news: A survey on identification and mitigation techniques.
	13. Credibility in social media: opinions, news, and health information—a survey
	14. Detecting breaking news rumors of emerging topics in social media
	15. Detecting Fake News in Social Media Networks
	16. Detecting opinion spams and fake news using text classification
	17. Detection of fake news in a new corpus for the Spanish language
	18. Fake News Detection on Social Media: A Data Mining Perspective
	19. Fake News Detection_ A Deep Learning Approach
	20. Fake News Early Detection: A Theory-driven Model
	21. Fake news portrayals of stem cells and stem cell research
	22. Fake News Prediction A Survey
	23. FakeNewsTracker: a tool for fake news collection, detection, and visualization
	24. Info-Trust A Multi-Criteria and Adaptive
	25. Polarization and Fake News: Early Warning of Potential Misinformation Targets
	26. News reliability evaluation using Latent Semantic Analysis
	27. Novel Visual and Statistical Image Features for Microblogs News Verification
	28. Opinion fraud detection via neural autoencoder decision forest
	29. Polarization and Fake News: EarlyWarning of Potential
	30. Proppy Organizing the news based on their propagandistic content
	31. Stance-In-DepthDeep Neural Approach to Stance Classification
	32. Supervised Learning for Fake News Detection
	33. Truth and deception at the retorical structure level
	34. Robust fake news detection over time and attack
	35. Fake news analysis modeling using quote retweet
	36. Rumor detection in Arabic tweets using semi-supervised and unsupervised expectation–maximization
	37. CED: credible early detection of social media rumors
	38. Rumors Detection on Twitter Using Machine Learning Techniques
	39. A pattern-based approach for sarcasm detection on twitter
	40. Detection of sarcasm and nastiness: new resources for Spanish language
	41. Twitter rumour detection in the health domain
	42. A corpus of debunked and verified user-generated videos
	43. Detection and Resolution of Rumours in Social Media: A Survey
	44. Automatic detection of satire in Twitter: A psycholinguistic-based approach,
	45. Towards reliable online clickbait video detection: A content-agnostic approach
	46. Official Statistics as Clickbait—The New Threat in the Post-truth Society?
	47. Rumour veracity detection on twitter using particle swarm optimized shallow classifiers
	48. Misinformation in Online Social Networks: Detect Them All with a Limited Budget
	49. The rumour spectrum
	50. Sentiment Analysis on Twitter Based on Ensemble of Psychological and Linguistic Feature Sets
	51. Recognition of Ironic Sentences in Twitter using Attention-Based LSTM
	52. Representing vaccine misinformation using ontologies.
	53. Detection and visualization of misleading content on Twitter
	54. exBAKE: Automatic Fake News Detection Model Based on Bidirectional Encoder Representations from Transformers (BERT)
	55. A Multi-semantics Classification Method Based on Deep Learning for Incredible Messages on Social Media
	56. Deep recurrent neural network and data filtering for rumor detection on Sina Weibo
	57. Detecting rumors through modeling information propagation networks in a social media environment
	58. Clickbait Convolutional Neural Network
	59. From Anomaly Detection to Rumour Detection using Data Streams of Social Platforms
	60. Is This Tweet Satirical? A Computational Approach for Satire Detection in Spanish
	61. Predicting Future Rumours
	Studies included in quantitative synthesis (n = 27)
	1. A framework for fake review detection in online consumer electronics retailers
	2. A semi-supervised approach to message stance classification
	3. A Survey on Detection of Fake News in Social Media
	4. A survey on fake news and rumour detection techniques
	5. An overview of online fake news Characterization, detection, and discussion
	6. Analysing how people orient to and spread rumours in social media by looking at conversational threads
	7. Big Data and quality data for fake news and misinformation detection
	8. Combating fake news: A survey on identification and mitigation techniques.
	9. Credibility in social media: opinions, news, and health information—a survey
	10. Detecting breaking news rumors of emerging topics in social media
	11. Detecting Fake News in Social Media Networks
	12. Detecting opinion spams and fake news using text classification
	13. Detection of fake news in a new corpus for the Spanish language
	14. Fake News Detection on Social Media: A Data Mining Perspective
	15. Fake News Detection_ A Deep Learning Approach
	16. Fake News Early Detection: A Theory-driven Model
	17. Fake News Prediction A Survey
	18. FakeNewsTracker: a tool for fake news collection, detection, and visualization
	19. Proppy Organizing the news based on their propagandistic content
	20. Supervised Learning for Fake News Detection
	21. Robust fake news detection over time and attack
	22. Fake news analysis modeling using quote retweet
	23. A corpus of debunked and verified user-generated videos
	24. Detection and visualization of misleading content on Twitter
	25. exBAKE: Automatic Fake News Detection Model Based on Bidirectional Encoder Representations from Transformers (BERT)
	26. Clickbait Convolutional Neural Network
	27. From Anomaly Detection to Rumour Detection using Data Streams of Social Platforms

## Sheet: dataset characteristics
Dataset	Year	Source	References	News Domain	Application area	Type of disinformation	Language	Size	Physical news content	Rating scale	Media platform	Spontaneity
Yelp dataset	2019	Request by email to o.araque@upm.es	Barbado et al., 2019	Technology	Fake detection	Fake reviews	English	18,912 reviews (9,456 fake reviews and 9,456 trustful reviews)	Text	2 values (fake and trustful)	Mainstream	Yes
PHEME dataset	2016	https://figshare.com/articles/PHEME_rumour_scheme_dataset_journalism_use_case/2068650/2	Zubiaga et al., 2016; Giasemidis et al., 2018; Bondielli and Marcelloni, 2019; Alkhodair et al., 2019	Society, politics	Rumour detection	Rumours	English and German	330 rumourous conversations (159 are true, 68 are false and 103 remained unverified) and	Text	3 values (true, false, or unverified	Social media (twitter)	Yes
CREDBANK	2015	https://github.com/compsocial/CREDBANK-data	Mitra and Gilbert, 2015; Sowmya and Shankar, 2019; Bondielli and Marcelloni, 2019; Zhang and Ghorbani, 2019	Society	Veracity classification	Rumours	English	60 million streaming tweets and 1,049 events annotated with credibility scores	Text	5 values (Certainly Inaccurate; Probably Inaccurate; Uncertain (Doubtful); Probably Accurate; Certainly Accurate)	Social media (twitter)	Yes
BuzzFace	2018	https://github.com/gsantia/BuzzFace	Santia and Williams, 2018; Sowmya and Shankar, 2019; Bondielli and Marcelloni, 2019; Reis et al., 2019	Politics, society	Veracity classification	Fake news articles	English	2,263 Facebook news from 9 facebook news pages ( 73.18% mostly true)	Text	4 values (mostly true, mostly false, mixture of true and false, and no factual content)	Social media (facebook)	Yes
FacebookHoax	2017	https://github.com/gabll/some-like-it-hoax	Tacchini et al., 2017; Sowmya and Shankar, 2019; Bondielli and Marcelloni, 2019	Science	Fake detection	Hoaxes	English	15,500 posts from 32 pages (14 conspiracy and 18 scientific) among which 8,923 (57.6%) are hoaxes and 6,577 (42.4%) non-hoaxes	Text	2 values (hoaxes, non-hoaxes)	Social media (facebook)	Yes
LIAR	2017	https://www.cs.ucsb.edu/ ̃william/data/liar_dataset.zip	Wang, 2018; Bondielli and Marcelloni, 2019; Zhang and Ghorbani, 2019; Aldwairi and Alwahedi, 2018; Torabi and Taboada, 2019	Politics	Fake detection	Fake news articles	English	12,836 human labeled short statements from POLITIFACT.COM’s API ( 1,050 pants-fire)	Text	6 values (pants-fire, false, barely-true, half-true, mostly-true, and true)	Mainstream + social media (facebook, twitter)	Yes
Fact checking dataset	2014	https://sites.google.com/site/andreasvlachos/resources	Vlachos and Riedel, 2014; Bondielli and Marcelloni, 2019	Politics, society	Fact checking	Fake news articles	English	221 statements from two websites (politifact.com and Channel 4)	Text	5 values (true, mostly true, half true, mostly false, and false)	Mainstream	Yes
FEVER	2018	http://fever.ai/resources.html	Thorne et al., 2018; Bondielli and Marcelloni, 2019; Torabi and Taboada, 2019	Society	Fact checking	Fake news articles	English	185,445 claims extracted from Wikipedia	Text	3 values ( supported, refuted, and notenoughinfo)	Mainstream	No
EMERGENT	2016	https://github.com/willferreira/mscproject	Ferreira and Vlachos, 2016; Bondielli and Marcelloni, 2019; Torabi and Taboada, 2019	Society, technology	Rumour detection	Rumours	English	300 claims, and 2,595 associated article headlines (47.7 % true, 15.2% false, 37.1 unverified)	Text	3 values (true, false or unverified)	Mainstream + social media (twitter)	Yes
FakeNewsNet	2018	https://github.com/KaiDMML/FakeNewsNet	Shu et al., 2018; Bondielli and Marcelloni, 2019; Zhang and Ghorbani, 2019	Society, politics	Fake detection	Fake news articles	English	422 news (211 fake news and 211 real news)	Text, images	2 values (fake and real)	Mainstream + social media (twitter)	Yes
Benjamin Political News Dataset	2017	https://github.com/rpitrust/fakenewsdata1	Horne and Adali, 2017; Zhang and Ghorbani, 2019; Ahmed et al., 2018	Politics	Fake detection	Fake news articles	English	225 stories from political news websites	Text	3 values (real, fake, and satire)	Mainstream	Yes
Burfoot Satire News Dataset	2009	https://github.com/rfong/satire/tree/master/corpus	Burfoot and Baldwin, 2009; Horne and Adali, 2017; Zhang and Ghorbani, 2019	Politics, economy, technology, society	Fake detection	Satire	English	4,000 real news	Text	2 values (newswire and satire)	Mainstream	Yes
								samples and 233 satire news samples
BuzzFeed News dataset	2017	https://github.com/BuzzFeedNews/2016-10-facebook-fact-check/tree/master/data	Horne and Adali, 2017; Zhang and Ghorbani, 2019	Politics	Fake detection	Fake news articles	English	2,283 news samples from Facebook	Text	4 values ( mostly true, not factual content, mixture of true and false, and mostly false)	Social media (facebook)	Yes
MisInfoText dataset	2019	https://github.com/sfu-discourse-lab/MisInfoText	Torabi and Taboada, 2019	Society	Fact checking	Fake news articles	English	1,692 news article (1,380 from BuzzFeed dataset and 312 from Snopes dataset)	Text	4 values for BuzzFeed and 5 values for Snopes ([fully] true, mostly true, mixture of true and false, mostly	Mainstream	Yes
										false, and [fully] false)
Ott et al.’s dataset	2011	http://www.cs.cornell.edu/ ̃myleott/op_spam	Ott et al., 2011; Viviani and Pasi, 2017; Ahmed et al., 2018	Tourism	Fake detection	Fake reviews	English	800 reviews (400 truthful and 400 gold-standard deceptive reviews from TripAdvisor)	Text	2 values (truthful and deceptive)	Social media (TripAdvisor)	No
FNC-1 dataset	2017	https://github.com/uclmr/fakenewschallenge	Riedel et al., 2017; Aldwairi and Alwahedi, 2018; Thota et al., 2018	Politics, society, technology	Fake detection	Fake news articles	English	49,972 articles (3,678 agree, 840 disagree, 8,909 discuss, and 3,654 unrelated)	Text	4 values (agree, disagree, discuss, or unrelated)	Mainstream	Yes
Spanish fake news corpus	2019	https://github.com/jp	Posadas-Durán et al., 2019	Science, Sport, Economy, Education, Entertainment, Politics, Health, Security, Society	Fake detection	Fake news articles	Spanish	971 news (491 true topics and 480 fake topics)	Text	2 values (true or fake)	Mainstream	Yes
		posadas/FakeNewsCorpusSpanish
Fake_or_real_news	2019	https://www.kaggle.com/rchitic17/real-or-fake	Dutta et al., 2019	Politics, society	Fake detection	Fake news articles	English	6,337 articles (50% real, 50% fake)	Text	2 values (true and false)	Mainstream	Yes
TSHP-17	2017	https://homes.cs.washington.edu/~hrashkin/factcheck.html	Rashkin et al., 2017; Barrón-Cedeno, 2019	Politics	Fact checking	Fake news articles	English	33,063 news articles (10,483 from PolitiFact.com and 22,580 from unreliable sources (5,750 trusted, 5,750 satire, 5,750 hoax, 5,330 propaganda))	Text	6 values for PolitiFact (True, MostlyTrue, Half-true, Mostly False, False, and Pants-on-fire False) and 4 values (trusted, satire, hoax, and propaganda) for unreliable sources	Mainstream	Yes
QProp	2017	http://proppy.qcri.org/about.html	Barrón-Cedeno, 2019	Politics	Fact checking	Fake news articles	English	51,294 articles (5,737	Text	2 values (propaganda, trustworthy)	Mainstream	Yes
								propagandistic and 45,557 trustworthy)
NELA-GT-2018	2019	[1]https://dataverse.harvard.edu/dataverse/nela	Nørregaard et al. 2019	Politics	Fake detection	Fake news articles	English	713000 articles	Text	2 values (true, false)	Mainstream	Yes
TW_info	2019	http://www.mdpi.com/2079-9292/8/12/1377/s1	Jang et al., 2019	Politics	Fake detection	Fake news articles	English	3472 (1387 fake (16453 tweets) and 2085 real (56651 tweets))	Text	2 values (fake, real)	social media (twitter)	Yes
FCV-2018	2019	https://mklab.iti.gr/results/fake-video-corpus/	Papadopoulou et al., 2019	Society	Fake detection	Fake news content	English, Russian, Spanish, Arabic, German, Catalan, Japanese, and Portuguese	380 videos and 77258 tweets	Videos, text	2 values	social media (YouTube, Facebook, Twitter)	Yes
Verification Corpus	2019	github.com/MKLab-ITI/image-verification-corpus	Boididou et al., 2018	Society	Veracity classification	Hoaxes	English, Spanish, Dutch, French	15629 posts	Text, images, videos	2 values	social media (Twitter)	Yes
CNN / Daily Mail summarization dataset	2019	https://github.com/abisee/cnn-dailymail	Jwa et al., 2019	Politics, society, crime, sport, economy, technology, health	Fake detection	Fake news articles	English	287000 articles	Text	4 values	Mainstream	Yes
Zheng et al.’s dataset	2017	https://github.com/chenjinyuan87/cbcnn	Zheng at al., 2017	Society	Clickbait detection	Fake news articles	Chinese	14922 headlines	Text	2 values	Mainstream + social media (Wechat)	Yes
Tam et al.’s dataset	2019	http://tiny.cc/p1s2qy	Tam et al., 2019	Politics, technology, science, crime, fraud and scam, fauxtography	Rumour detection	Rumours	English	1022 rumours and 4 million tweets	Text	2 values	social media (Twitter)	Yes

## Sheet: quantitative data analysis
							Veracity classification	2
							Fact checking	5
							Fake detection	13
							Rumour detection	2
							Technology	4			fake reviews	2
							politics	15			hoaxes	1
							economy	2			fake news articles	15
							society	12			satire	1
							science	2			rumours	3
							security	1
							health	1
							tourism	1
							sport	1
							education	1
							entartainment	1											Yelp dataset	18912
																			PHEME dataset	4842
																			CREDBANK	169000000
																			BuzzFace	2282
																			FacebookHoax	15500
																			LIAR	12800
																			Fact checking dataset	221
																			FEVER	185445
																			EMERGENT	2595
																			FakeNewsNet	422
																			Benjamin Political News Dataset	75
																			Burfoot Satire News Dataset	4233
																			BuzzFeed News dataset	2000
																			MisInfoText dataset	1692
																			Ott et al.’s dataset	800
																			FNC-1 dataset	49972
																			Spanish fake news corpus	971
Benjamin Political News	75																		Fake_or_real_news	6337
Fact checking	221
FakeNewsNet	422
Ott et al.’s	800
Spanish fake news corpus	971
MisInfoText	1692
BuzzFeed News	2000
BuzzFace	2263
EMERGENT	2595
TW_info	3472
Burfoot Satire News	4233
PHEME	4842
Fake_or_real_news	6337
LIAR	12836
FacebookHoax	15500
Yelp	18912
TSHP-17	33063
FNC-1	49972
QProp	51294
FEVER	185445
NELA-GT-2018	713000
CREDBANK	60000000
Yelp dataset	2 values					2 values	10
PHEME dataset	3 values					3 values	4
CREDBANK	5 values					4 values	5
BuzzFace	4 values					5 values	2
FacebookHoax	2 values					6 values	1
LIAR	6 values
Fact checking dataset	5 values
FEVER	3 values
EMERGENT	3 values
FakeNewsNet	2 values
Benjamin Political News Dataset	3 values
Burfoot Satire News Dataset	2 values
BuzzFeed News dataset	4 values
MisInfoText dataset	4 values
Ott et al.’s dataset	2 values					mainstream	12
FNC-1 dataset	4 values					social media	7
Spanish fake news corpus	2 values					mainstream + social media	3
Fake_or_real_news	2 values
TSHP-17	4 values
QProp	2 values

## Sheet: comparative analysis
	Dataset	Availability of fake and real	Accessibility to text	Verifiability of truth	Homogeneity in news length	Homogeneity in news domain	Belonging to a predefined time frame	Homogeneity in type of disinformation	Public availability	Multilinguality/multiculturality	Homogeneity in application purpose
	Yelp dataset	1	1	Fact-checked by journalists and crowdsourcing	no	technology purpose		(fake reviews)	1		Fake detection
	PHEME dataset	1	1	Fact-checked by journalists	Tweet	breaking news		(rumors)	1	(330 conversational threads (297 in English, and 33 in German)	Rumour detection
	CREDBANK	1	1	Fact-checked by workers	Tweet		(96 days from October 2014)	(rumors)	1		Veracity classification
	BuzzFace	1	1	(Fact-checked by journalists	FB post	Political purpose	(seven weekdays in September 2016)	(fake articles)	1		Veracity classification
	FacebookHoax	1	1	Fact-checked by researches	(FB post)	Scientific purpose	-	(hoaxes)	1		Fake detection
	LIAR	1	1	(Fact-checked by editors and journalists)	(short claim)	Political purpose	(2007-2016)	(fake articles)	1		Fake detection
	Fact checking dataset	1	1	Fact-checked by researches	article			(fake articles)	1		Fact checking
	FEVER	1	1	Trained annotators	short claim			rumors	1		Fact checking
	EMERGENT	1	1	(Fact-checked by researches)	article		-	(fake articles)	1		Rumour detection
	FakeNewsNet	1	1	(Fact-checked by editors)	article			(fake articles)	1		Fake detection
	Benjamin Political News Dataset	1	1	(Fact-checked by journalists)	Tweet	Political purpose	2014-2015	(satire)	1		Fake detection
	Burfoot Satire News Dataset	1	1	Fact-checked by researches	article			(fake articles)	1		Fact checking
	BuzzFeed News dataset	1	1	(Fact-checked by journalists)	FB post	Political purpose	(19-27 2016)	(fake articles)	1		Fake detection
	MisInfoText dataset	1	1	1	article	Political purpose		(fake reviews)	1		Fake detection
	Ott et al.’s dataset	1	1	( Fact-checked by trained human annotators)	review	Tourism purpose		(fake articles)	1		Fake detection
	FNC-1 dataset	1	1		article			(fake articles)	1		Fake detection
	Spanish fake news corpus	1	1	(Fact-checked by journalists)	article		(from January to July of 2018)	(fake articles)	1		Fake detection
	Fake_or_real_news	1	1	Fact-checked by researches	article			(fake articles)	1		Fake detection
	TSHP-17	1	1	Fact-checked by researches	article	Political purpose		(fake articles)	1		Fact checking
	QProp	1	1	Fact-checked by researches		Political purpose		(fake articles)	1		Fact checking
	NELA-GT-2018	1	1	Fact-checked by assessment sites	article	Political purpose	form february 2018 to november 2018	misinformation	1		Fake detection
	TW_info dataset	1	1	fact-checked by researchers	tweet	Political purpose	January 2015 to April 2019	fake articles	1		Fake detection
	FCV-2018	1	1	Fact-checked by assessment sites and human annotators	no	Society	From April 2017 to January 2018	fake articles	1	English, Russian, Spanish, Arabic, German	Fake detection
	Verification Corpus	1	1	Fact-checked by editors	no	Society	2012-2015	fake articles	1	English, Spanish, Dutch, French	Veracity classification
	CNN / Daily Mail summarization dataset	1	1	Fact-checked by trained human annotators	article		From April 2007 to April 2015	fake articles	1		Fake detection
	Zheng et al.’s dataset	1	1	Fact-checked by researchers	headlines	Society	-	clickbait	1		clickbait detection
	Tam et al.’s dataset	1	1	Fact-checked by researchers	no		From May 2017 to November 2017	rumors	1		rumour detection
	Dataset	Verifiability of truth	Verifiability of truth				Verifiability of truth
	Yelp dataset	Fact-checked by journalists and crowdsourcing					Fact-checked by journalists and crowdsourcing	1
	PHEME dataset	Fact-checked by journalists					Fact-checked by journalists	6
	CREDBANK	Fact-checked by workers					Fact-checked by workers	1
	BuzzFace	Fact-checked by journalists					Fact-checked by researchers	11
	FacebookHoax	Fact-checked by researches					Trained annotators	1
	LIAR	(Fact-checked by editors and journalists)					Fact-checked by editors	2
	Fact checking dataset	Fact-checked by researches					Fact-checked by trained human annotators	2
	FEVER	Trained annotators					Fact-checked by editors and journalists	1
	EMERGENT	Fact-checked by journalists					Fact-checked by assessment sites	1
	FakeNewsNet	Fact-checked by editors					Fact-checked by assessment sites and human annotators	1
	Benjamin Political News Dataset	Fact-checked by journalists
	Burfoot Satire News Dataset	no					tot	27
	BuzzFeed News dataset	Fact-checked by journalists
	MisInfoText dataset	no
	Ott et al.’s dataset	Fact-checked by trained human annotators
	FNC-1 dataset	no
	Spanish fake news corpus	Fact-checked by journalists)
	Fake_or_real_news	Fact-checked by researches
	TSHP-17	Fact-checked by researches
	QProp	Fact-checked by researches
	NELA-GT-2018	Fact-checked by assessment sites
	TW_info dataset	Fact-checked by researchers
	FCV-2018	Fact-checked by assessment sites and human annotators
	Verification Corpus	Fact-checked by editors
	CNN / Daily Mail summarization dataset	Fact-checked by trained human annotators
	Zheng et al.’s dataset	Fact-checked by researchers
	Tam et al.’s dataset	Fact-checked by researchers
	Dataset	Homogeneity in length			Homogeneity in news length
	Yelp dataset	article			Article	11
	PHEME dataset	Tweet			Tweet	4
	CREDBANK	Tweet			FB post	3
	BuzzFace	FB post			short claim	2
	FacebookHoax	(FB post)			statement	2
	LIAR	(short claim)			review	1
	Fact checking dataset	statments			headline	1
	FEVER	short claim			no	3
	EMERGENT	statments
	FakeNewsNet	article			tot	27
	Benjamin Political News Dataset	Tweet
	Burfoot Satire News Dataset	article
	BuzzFeed News dataset	FB post
	MisInfoText dataset	article
	Ott et al.’s dataset	review
	FNC-1 dataset	article
	Spanish fake news corpus	article
	Fake_or_real_news	article
	TSHP-17	article
	QProp	article
	NELA-GT-2018	article
	TW_info dataset	tweet
	FCV-2018	no
	Verification Corpus	no
	CNN / Daily Mail summarization dataset	article
	Zheng et al.’s dataset	headlines
	Tam et al.’s dataset	no
	Dataset	Homogeneity in writing style			Homogeneity in news domain
	Yelp dataset	technology purpose			Technology	1
	PHEME dataset	breaking news			Society	6
	CREDBANK	no			Politics	7
	BuzzFace	Political purpose			Science	1
	FacebookHoax	Scientific purpose			Tourism	1
	LIAR	Political purpose			no	11
	Fact checking dataset	no
	FEVER	no			tot	27
	EMERGENT	no
	FakeNewsNet	no
	Benjamin Political News Dataset	Political purpose
	Burfoot Satire News Dataset	no
	BuzzFeed News dataset	Political purpose
	MisInfoText dataset	Political purpose
	Ott et al.’s dataset	Tourism purpose
	FNC-1 dataset	no
	Spanish fake news corpus	no
	Fake_or_real_news	no
	TSHP-17	Political purpose
	QProp	Political purpose
	NELA-GT-2018	Political purpose
	TW_info dataset	Political purpose
	FCV-2018	Society
	Verification Corpus	Society
	CNN / Daily Mail summarization dataset	no
	Zheng et al.’s dataset	Society
	Tam et al.’s dataset	no
	Dataset	Homogeneity in type of disinformation			Homogeneity in type of disinformation
	Yelp dataset	(fake reviews)			fake reviews	2
	PHEME dataset	(rumors)			rumors	4
	CREDBANK	(rumors)			fake articles	17
	BuzzFace	(fake articles)			hoaxes	1
	FacebookHoax	(hoaxes)			satire	1
	LIAR	(fake articles)			misinformation	1
	Fact checking dataset	(fake articles)			clickbait	1
	FEVER	(rumors)
	EMERGENT	(fake articles)			tot	27
	FakeNewsNet	(fake articles)
	Benjamin Political News Dataset	(satire)
	Burfoot Satire News Dataset	(fake articles)
	BuzzFeed News dataset	(fake articles)
	MisInfoText dataset	(fake reviews)
	Ott et al.’s dataset	(fake articles)
	FNC-1 dataset	(fake articles)
	Spanish fake news corpus	(fake articles)
	Fake_or_real_news	(fake articles)
	TSHP-17	(fake articles)
	QProp	(fake articles)
	NELA-GT-2018	misinformation
	TW_info dataset	fake articles
	FCV-2018	fake articles
	Verification Corpus	fake articles
	CNN / Daily Mail summarization dataset	fake articles
	Zheng et al.’s dataset	clickbait
	Tam et al.’s dataset	rumors
			Homogeneity in application purpose
Dataset	Homogeneity in application purpose		Veracity classification	3
Yelp dataset	Fake detection		Fact checking	5
PHEME dataset	Rumour detection		Fake detection	15
CREDBANK	Veracity classification		Rumour detection	3
BuzzFace	Veracity classification		clickbait detection	1
FacebookHoax	Fake detection
LIAR	Fake detection		tot	27
Fact checking dataset	Fact checking
FEVER	Fact checking
EMERGENT	Rumour detection
FakeNewsNet	Fake detection
Benjamin Political News Dataset	Fake detection
Burfoot Satire News Dataset	Fact checking
BuzzFeed News dataset	Fake detection
MisInfoText dataset	Fake detection
Ott et al.’s dataset	Fake detection
FNC-1 dataset	Fake detection
Spanish fake news corpus	Fake detection
Fake_or_real_news	Fake detection
TSHP-17	Fact checking
QProp	Fact checking
NELA-GT-2018	Fake detection
TW_info dataset	Fake detection
FCV-2018	Fake detection
Verification Corpus	Veracity classification
CNN / Daily Mail summarization dataset	Fake detection
Zheng et al.’s dataset	clickbait detection
Tam et al.’s dataset	rumour detection
